# Supplementary material
Source: publisher figshare collection journal article supplement (https://tandf.figshare.com/articles/dataset/_/2065884)
Supplement: Supplementary file 1 [file 1]

Table S2

Post hoc multiple comparisons for characteristics and glucose results of the study population.

| Variable                               | GCT-negative vs. BGI<br>with MNT    | GCT-negative vs.<br>BGI without MNT | GCT-negative vs.<br>GDM      |
|----------------------------------------|-------------------------------------|-------------------------------------|------------------------------|
| Maternal age (yr)                      | -0.97 ( -1.70 , -0.23 ) *           | -1.51 ( -1.99 , -1.03 ) *           | -2.84 ( -3.52 , -2.17 ) *    |
| Pre-pregnancy BMI (kg/m <sup>2</sup> ) | -0.25 ( -0.83 , 0.32 )              | -0.84 ( -1.21 , -0.46 ) *           | -1.83 ( -2.36 , -1.30 ) *    |
| Gestational week at study entry        | 0.72 ( 0.50 , 0.94 ) *              | 1.98 ( 1.74 , 2.22 ) *              | 0.85 ( 0.69 , 1.00 ) *       |
| Gestational week at delivery           | 0.22 ( 0.00 , 0.44 )                | 0.13 ( -0.02 , 0.27 )               | 0.43 ( 0.23 , 0.63 ) *       |
| Weight gain during pregnancy           | 0.90 ( 0.14 , 1.67 ) *              | 0.58 ( 0.08 , 1.08 ) *              | 1.63 ( 0.93 , 2.33 ) *       |
| 50-g GCT levels (mg/dL)                | -45.47 ( -48.22 , -42.71 ) *        | -47.00 ( -48.79 , -45.20 ) *        | -62.33 ( -64.86 , -59.79 ) * |
| Variable                               | BGI with MNT vs.<br>BGI without MNT | BGI with MNT vs.<br>GDM             | BGI without MNT vs.<br>GDM   |
| Maternal age (yr)                      | -0.54 ( -1.38 , 0.29 )              | -1.88 ( -2.84 , -0.92 ) *           | -1.33 ( -2.11 , -0.55 ) *    |
| Pre-pregnancy BMI (kg/m <sup>2</sup> ) | -0.58 ( -1.24 , 0.07 )              | -1.58 ( -2.33 , -0.83 ) *           | -1.00 ( -1.61 , -0.38 ) *    |
| Gestational week at study entry        | -1.13 ( -1.41 , -0.86 ) *           | -1.26 ( -1.58 , -0.94 ) *           | -0.13 ( -0.39 , 0.13 )       |
| Gestational week at delivery           | -0.09 ( -0.35 , 0.16 )              | 0.21 ( -0.08 , 0.50 )               | 0.30 ( 0.07 , 0.54 ) *       |
| Weight gain during pregnancy           | -0.32 ( -1.19 , 0.54 )              | 0.73 ( -0.27 , 1.73 )               | 1.05 ( 0.24 , 1.87 ) *       |
| 50-g GCT levels (mg/dL)                | -1.53 ( -4.67 , 1.61 )              | -16.86 ( -20.47 , -13.25 ) *        | -15.33 ( -18.27 , -12.39 ) * |
| 100-g OGTT levels (mg/dL)              |                                     |                                     |                              |
| Fasting                                | -0.95 ( -2.22 , 0.32 )              | -7.48 ( -8.95 , -6.02 ) *           | -6.53 ( -7.72 , -5.34 ) *    |
| 1 hr                                   | 0.37 ( -3.67 , 4.40 )               | -42.70 ( -47.34 , -38.06 ) *        | -43.07 ( -46.84 , -39.29 ) * |
| 2 hr                                   | -0.47 ( -4.01 , 3.07 )              | -44.99 ( -49.07 , -40.92 ) *        | -44.52 ( -47.84 , -41.20 ) * |
| 3 hr                                   | -1.87 ( -5.84 , 2.10 )              | -29.13 ( -33.70 , -24.57 ) *        | -27.26 ( -30.98 , -23.54 ) * |

GCT, glucose challenge test; BGI, borderline glucose intolerance; MNT, medical nutrition therapy; GDM, gestational diabetes mellitus; BMI, body mass index; OGTT, oral glucose tolerance test.

Data are presented as mean differences (95% confidence interval) and the Tukey's studentized range (HSD) test was performed.

Significant comparisons at the 0.05 level are indicated by \*.
