# Supplementary material
Source: publisher figshare collection journal article supplement (https://tandf.figshare.com/articles/dataset/_/2065884)
Supplement: Supplementary file 2 [file 1]

Table S1

Modified IOM 2009 guideline for total weight gain during pregnancy by pre-pregnancy BMI categories in Taiwan.

| Pre-pregnancy BMI | IOM <sup>a</sup> | Taiwan <sup>b</sup> | Total Weight Gain (lbs) | Total Weight Gain (kg) |
|-------------------|------------------|---------------------|-------------------------|------------------------|
| Underweight       | <18.5            | <18.5               | 28–40                   | 12.7-18.1              |
| Normal weight     | 18.5-24.9        | 18.5-23.9           | 25–35                   | 11.3-15.9              |
| Overweight        | 25.0-29.9        | 24.0-26.9           | 15–25                   | 6.8-11.3               |
| Obese             | ≥30.0            | ≥27.0               | 11–20                   | 5.0-9.1                |

IOM, Institute of Medicine

<sup>a</sup> The IOM 2009 guideline:

<http://iom.edu/Reports/2009/Weight-Gain-During-Pregnancy-Reexamining-the-Guidelines.aspx>

<sup>b</sup> The Bureau of Health Promotion, Department of Health, Taiwan:

[http://health99.hpa.gov.tw/OnlinkHealth/Onlink\\_BMI.aspx](http://health99.hpa.gov.tw/OnlinkHealth/Onlink_BMI.aspx)
